# Supplementary material for: Eutectic doped Li4SiO4 adsorbents using the optimal dopants for highly efficient CO2 removal
Source: Royal Society of Chemistry journal article supplement (doi:10.1039/d1ta01404h), 2021-01-01
Supplement: d1ta01404h1.pdf [file d1ta01404h1.pdf]

# Supplementary Materials

## Eutectic doped $\text{Li}_4\text{SiO}_4$ adsorbents using the optimal dopants for highly efficient $\text{CO}_2$ removal

Yuandong Yang<sup>1</sup>, Jixue Cao<sup>1</sup>, Yingchao Hu<sup>2</sup>, Jian Sun<sup>3</sup>, Shun Yao<sup>1</sup>, Qiuwan Li<sup>1</sup>, Zexin Li<sup>1</sup>, Shimeng Zhou<sup>1</sup>,

Wenqiang Liu<sup>1,\*</sup>

1. State Key Laboratory of Coal Combustion, School of Energy and Power Engineering, Huazhong University of Science and Technology, Wuhan, 430074, China

2. School of Energy Science and Engineering, Central South University, Changsha, 410083, China

3. Jiangsu Provincial Key Laboratory of Materials Cycling and Pollution Control, School of Energy and Mechanical Engineering, Nanjing Normal University, Nanjing, 210042, China

\*Corresponding author: Tel: +86 27 87542417-8503; Fax: +86 27 87545526;

E-mail: [wenqiang.liu@hust.edu.cn](mailto:wenqiang.liu@hust.edu.cn)

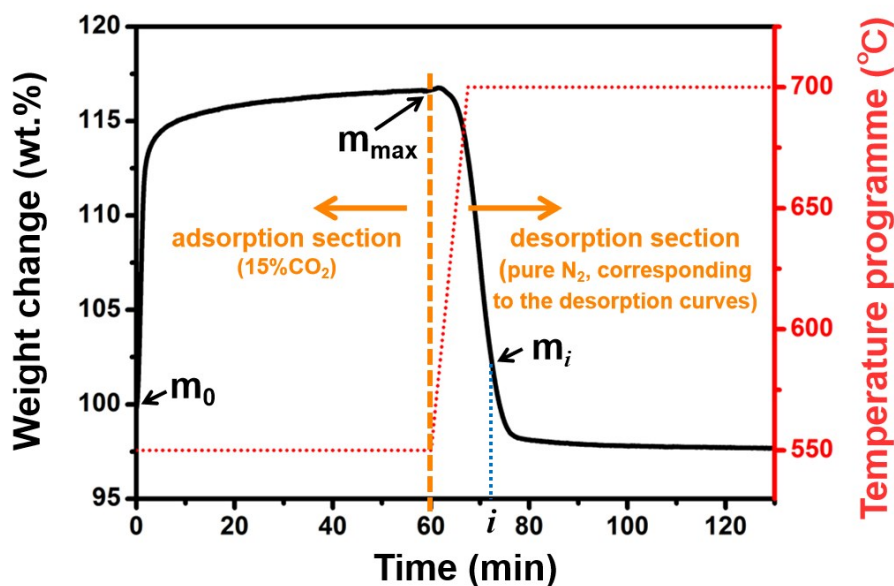

Fig. S1. Schematic sketch of the desorption test and the calculation of desorption curves involved in this work.

**Table S1.** BET specific surface area and average pore diameter of doped adsorbents

| Samples                           | BET surface area<br>(m <sup>2</sup> /g) | Average pore diameter<br>(Å) |
|-----------------------------------|-----------------------------------------|------------------------------|
| L-Raw                             | 0.336                                   | 95.958                       |
| L-NaBr                            | 0.313                                   | 98.863                       |
| L-KBr                             | 0.316                                   | 93.199                       |
| L-NaCl                            | 0.268                                   | 99.205                       |
| L-KCl                             | 0.245                                   | 86.355                       |
| L-NaF                             | 0.326                                   | 93.027                       |
| L-KF                              | 0.353                                   | 96.005                       |
| L-Na <sub>2</sub> SO <sub>4</sub> | 0.342                                   | 96.828                       |
| L-K <sub>2</sub> SO <sub>4</sub>  | 0.333                                   | 98.222                       |
| L-Na <sub>2</sub> CO <sub>3</sub> | 0.369                                   | 86.728                       |
| L-K <sub>2</sub> CO <sub>3</sub>  | 0.342                                   | 87.536                       |
| L-NaNO <sub>3</sub>               | 0.240                                   | 86.936                       |
| L-KNO <sub>3</sub>                | 0.231                                   | 87.527                       |
| average value                     | 0.309                                   | 92.799                       |
| standard error                    | 0.045                                   | 4.900                        |

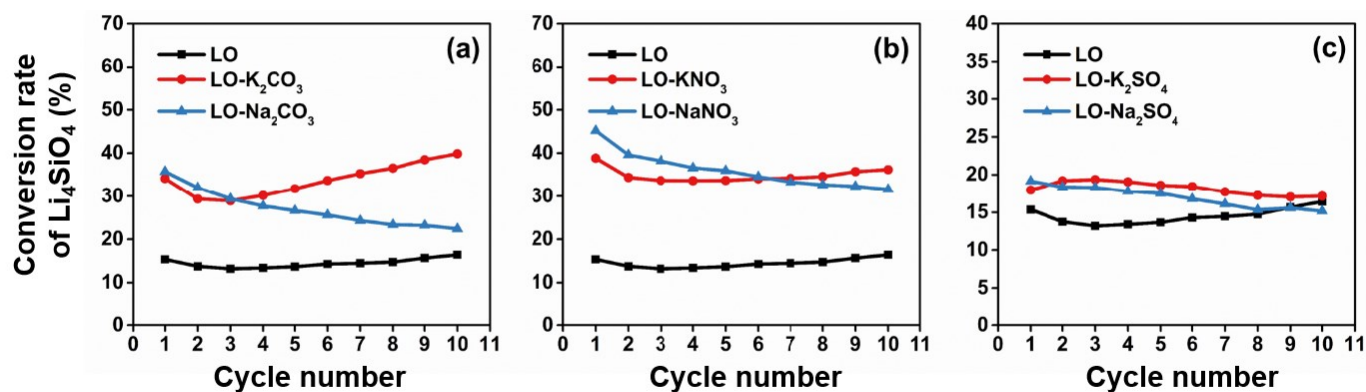**Fig. S2.** Comparisons of the cyclic stability in (a) carbonate-doped adsorbents, (b) nitrate-doped adsorbents and (c) sulfate-doped adsorbents.
